# Supplementary material for: DOX-Fe3O4@mSiO2-PO-FA nanocomposite for synergistic chemo- and photothermal therapy
Source: Royal Society of Chemistry journal article supplement (doi:10.1039/c6ra23292b), 2016-01-01
Supplement: c6ra23292b1.pdf [file c6ra23292b1.pdf]

## **Supporting Information**

### **DOX-Fe<sub>3</sub>O<sub>4</sub>@mSiO<sub>2</sub>-PO-FA nanocomposite for synergistic chemo- and photothermal therapy**

Xiangjie Luo, Ying Wang, Huiming Lin,\* and Fengyu Qu\*

*College of Chemistry and Chemical Engineering, Harbin Normal University, Harbin,*

*150025, P. R. China.*

## 1. Synthesis of 3, 3'-(propane-2, 2-diylbis (oxy)) bis (2, 2-dimethylpropanoic acid)

In a three necked round bottomed flask, anhydrous acetone and hydroxy-2, 2-dimethylpropanoic acid by a ratio of 1: 3 was injected. At the same time, a proper amount of p-toluensulfonic acid as catalyst also was joined. Then, pouring into a certain amount of benzene as solvent reflux 16 h, and rotating evaporation was adopted to remove solvent.

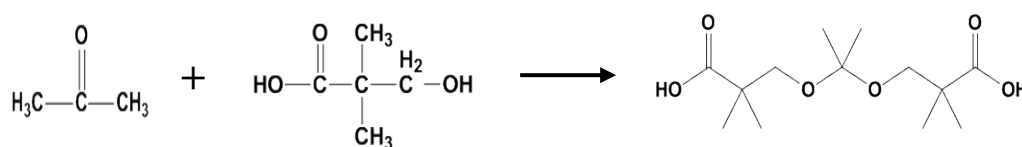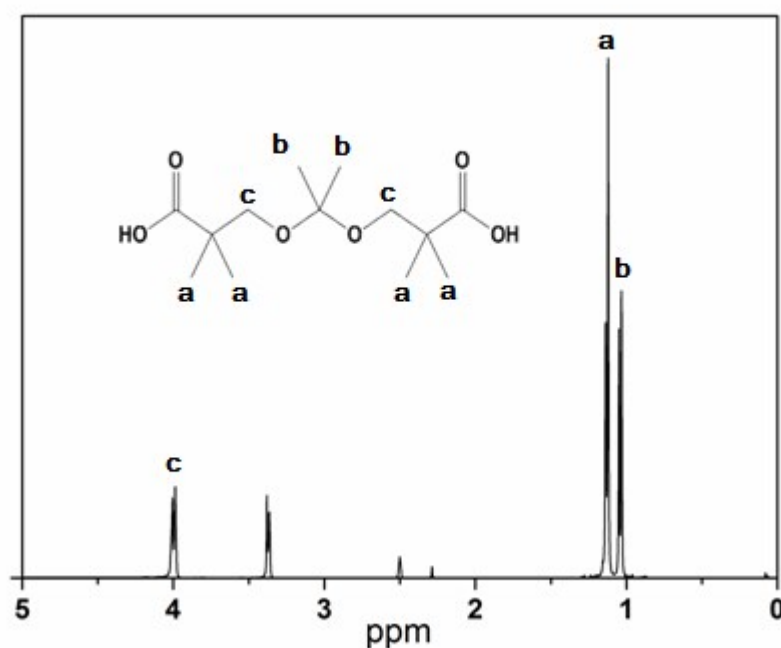

Figure S1. The synthetic route and <sup>1</sup>H NMR spectrum of 3, 3'-(propane-2, 2-diylbis (oxy)) bis (2, 2-dimethylpropanoic acid).

## 2. Synthesis of the linker-PO

In a typical procedure, 276.0 mg (1mmol) of S1, 191.7 mg (1mmol) of N-(3-Dimethylaminopropyl)-N-ethylcarbodiimidehydrochloride (EDC), 115.1 mg (1mmol) of N-Hydroxysuccinimide (NHS), and 442.7 mg (2 mmol) (3-aminopropyl)triethoxysilane (APTES) were dissolved in 2 mL of dimethylsulfoxide (DMSO) and stirred for 24 h.

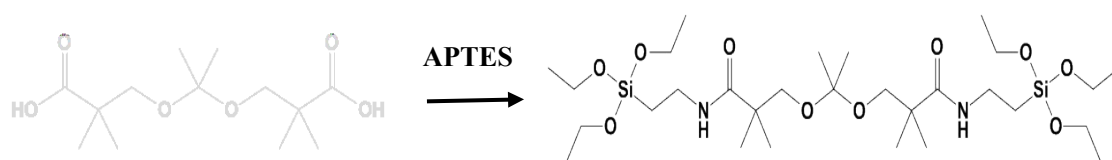

Figure S2. The Synthetic route of PO linker.

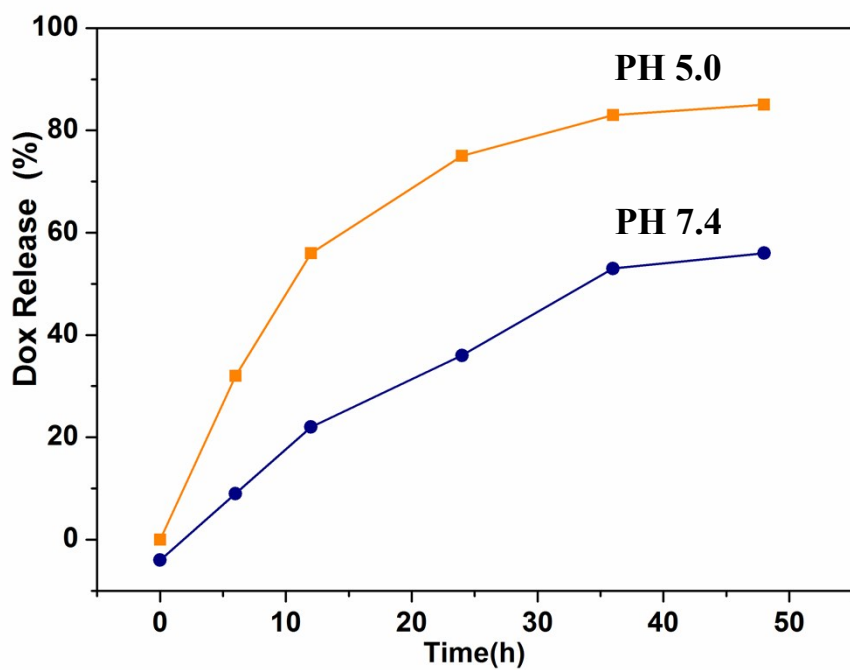

Figure S3. Release profiles of DOX from DOX-Fe<sub>3</sub>O<sub>4</sub>@mSiO<sub>2</sub> at pH 5.0 and 7.4.

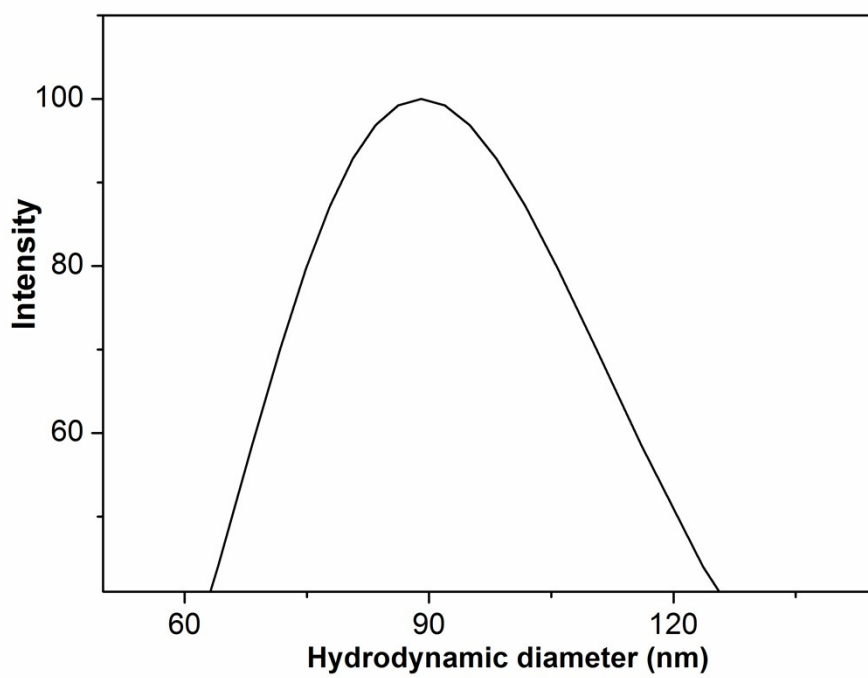

Figure S4. DLS results of Fe<sub>3</sub>O<sub>4</sub>@mSiO<sub>2</sub>
